# Supplementary material for: Significant mass loss in the accumulation area of the Adamello glacier indicated by the chronology of a 46 m ice core
Source: Copernicus journal article supplement (doi:10.5194/tc-15-4135-2021), 2021-08-30
Supplement: Supplementary file 1 [file tc-15-4135-2021-supplement.pdf]

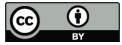

*Supplement of*

## **Significant mass loss in the accumulation area of the Adamello glacier indicated by the chronology of a 46 m ice core**

**Daniela Festi et al.**

*Correspondence to:* Daniela Festi ([daniela.festi.dr@gmail.com](mailto:daniela.festi.dr@gmail.com))

The copyright of individual parts of the supplement might differ from the article licence.

## Supplementary Material

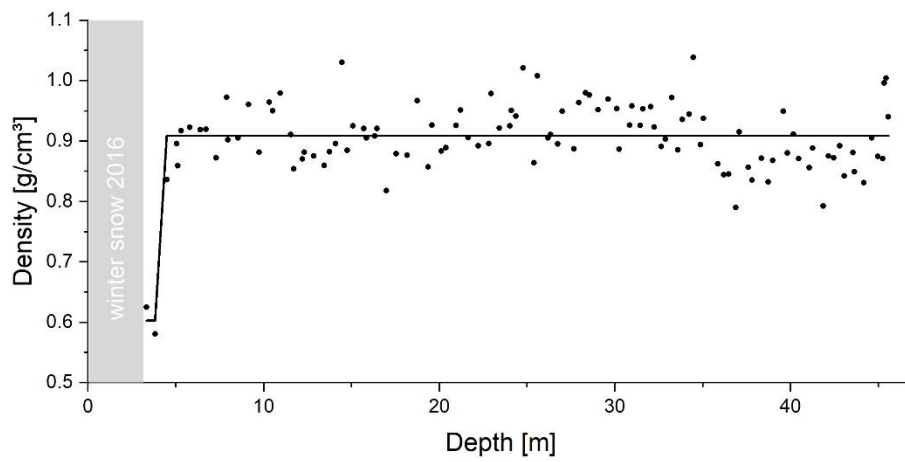

**Figure S1.** ADA 16 ice core density profile. Dots represent measured density values; the line represents mean density values.

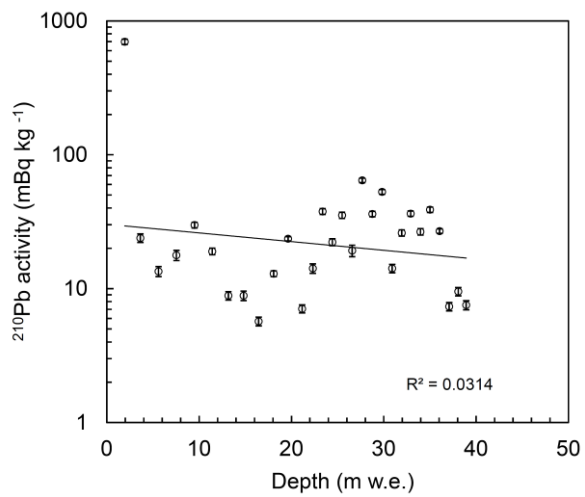

**Figure S2.** ADA16 profile of  $^{210}\text{Pb}$  activity concentrations.
